# Supplementary material
Source: PubMed Central journal article supplement (PMC4679381)

Supplemental material

Table S1. Clinicopathological Parameters in 148 patients with prostate cancer

|                                      | n=148       |      |
|--------------------------------------|-------------|------|
|                                      | mean ± S.D. |      |
| Age(year)                            | 65.6±       | 6.41 |
| <70                                  | 99          |      |
| ≥70                                  | 49          |      |
| Pre-operative PSA (ng/ml)            | 11.6±       | 12.6 |
| <10.0                                | 89          |      |
| ≥10.0                                | 54          |      |
| unknown                              | 5           |      |
| Histological grade(Gleason score)    |             |      |
| ≤3+4                                 | 103         |      |
| ≥4+3                                 | 45          |      |
| Pathologic stage(TMN classification) |             |      |
| pT2                                  | 101         |      |
| pT3-4                                | 47          |      |
| Surgical margin                      |             |      |
| negative                             | 81          |      |
| positive                             | 67          |      |
| Lymph node metastasis                |             |      |
| negative                             | 141         |      |
| positive                             | 4           |      |
| unknown                              | 3           |      |
| Lympho vascular invasion             |             |      |
| negative                             | 136         |      |
| positive                             | 12          |      |

Figure S1 Kaplan-Meier survival curve analysis

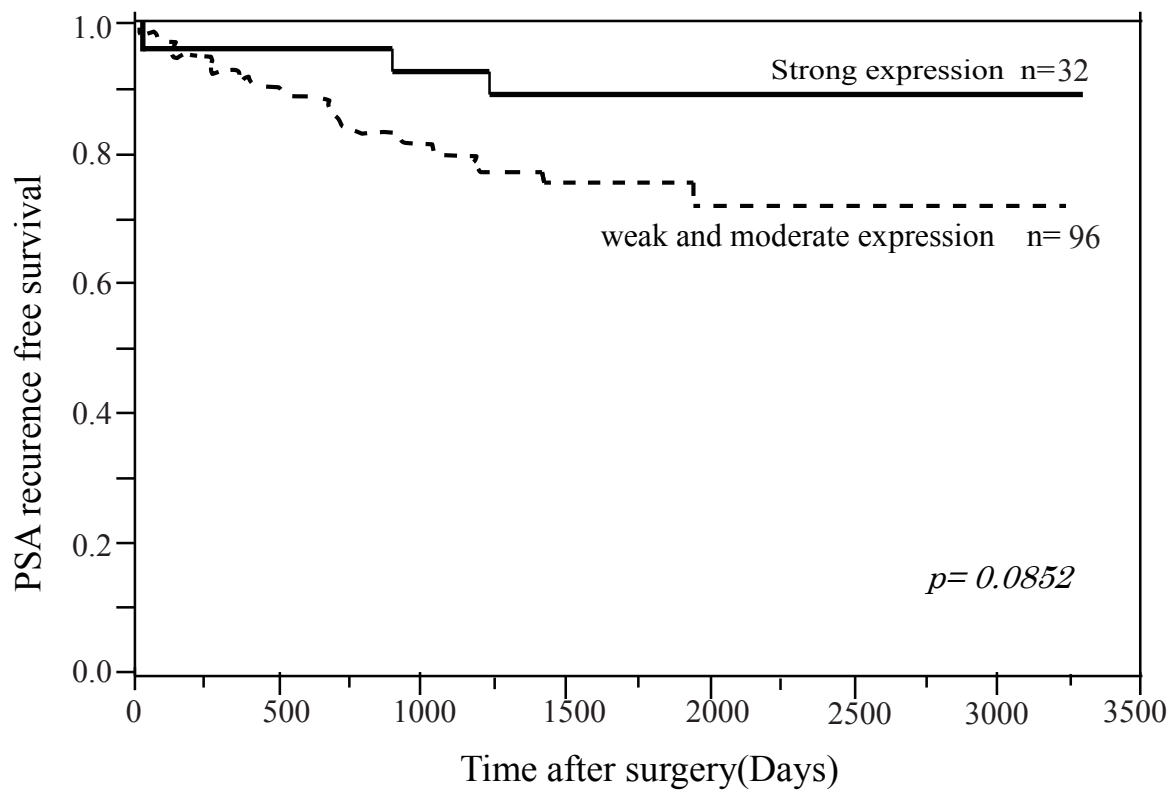

Supplement: jcav07p0050s1.pdf [file jcav07p0050s1.pdf]
